# Supplementary material
Source: PubMed Central journal article supplement (PMC5730512)

**Note to readers with disabilities:** *EHP* strives to ensure that all journal content is accessible to all readers. However, some figures and Supplemental Material published in *EHP* articles may not conform to [508 standards](#) due to the complexity of the information being presented. If you need assistance accessing journal content, please contact [ehponline@niehs.nih.gov](mailto:ehponline@niehs.nih.gov). Our staff will work with you to assess and meet your accessibility needs within 3 working days.

## **Supplemental Material**

### **Time-Series Analysis of Heat Waves and Emergency Department**

#### **Visits in Atlanta, Georgia, 1993 to 2012**

Tianqi Chen, Stefanie Ebel Sarnat, Andrew J. Grundstein, Andrea Winquist, and Howard H. Chang

#### **Table of Contents**

**Table S1.** The concordance-discordance between heat wave metrics in Atlanta, 1993-2012.

**Table S2.** Relative risk estimates and 95% confidence intervals of associations of heat wave days compared to non-heat wave days for emergency department visits for all 17 health outcomes.

**Table S3.** Relative risk estimates and 95% confidence interval for emergency department visits in relation to the order of heat wave day defined using maximum or minimum temperature.

**Table S4.** Relative risk estimates and 95% confidence interval for emergency department visits in relation to the order of heat wave periods within a year defined using maximum or minimum temperature.

**Table S5.** Relative risk estimates and 95% confidence interval for emergency department visits associated with per 1°C increase in average temperature during heat waves.

**Figure S1.** Estimated relative risks and 95% confidence intervals for ED visits associated with lag 0 heat wave days compared to non-heat wave days, controlling for different continuous temperature metrics.

**Figure S2.** Estimated relative risks and 95% confidence intervals for ED visits associated with lag 0 and lag 1 heat wave days compared to non-heat wave days, controlling for different continuous dew-point temperature and relative humidity metrics.

**Table S1.** The concordance-discordance between heat wave metrics during May to September in Atlanta, 1993-2012. Heat waves are defined as periods of  $\geq 2$  consecutive days with temperature (T) or apparent temperature (AT) exceeding the 98<sup>th</sup> percentile using daily maximum (MAX), minimum (MIN), or average (AVG). The first day of the heat wave period is considered a non-heat day.

| Heat Wave Definitions | MAXT     | MINT      | AVGT     | MAXAT    | MINAT    | AVGAT |
|-----------------------|----------|-----------|----------|----------|----------|-------|
| MAXT                  |          | 256       | 133      | 122      | 150      | 143   |
| MINT                  | 67 (26%) |           | 251      | 259      | 232      | 245   |
| AVGT                  | 81 (61%) | 104 (41%) |          | 141      | 154      | 147   |
| MAXAT                 | 78 (64%) | 82 (32%)  | 91 (65%) |          | 154      | 139   |
| MINAT                 | 37 (25%) | 96 (41%)  | 65 (42%) | 51 (33%) |          | 139   |
| AVGAT                 | 66 (46%) | 105 (43%) | 94 (64%) | 88 (63%) | 75 (54%) |       |

The upper triangular elements give the number of days where heat wave occurred using either metrics (union days). The lower triangular elements give the number of days where heat waves occurred using both metrics (intersection days). The concordance percentages are calculated by dividing the number of intersection days by the number of union days.

**Table S2.** Relative risk (RR) estimates and 95% confidence intervals (CI) of associations of heat wave days compared to non-heat wave days for ED visits during May to September in Atlanta, 1993-2012. Heat waves were defined as periods of  $\geq 2$  consecutive days with temperature (T) or apparent temperature (AT) exceeding the 98<sup>th</sup> percentile using daily maximum (MAX), minimum (MIN), or average (AVG). The first day of the heat wave period is considered a non-heat day.

| Outcome                          | Heat Wave | lag0                 | lag1                 | lag2                 | lag3                 |
|----------------------------------|-----------|----------------------|----------------------|----------------------|----------------------|
|                                  |           | R.R. (95% C.I.)      | R.R. (95% C.I.)      | R.R. (95% C.I.)      | R.R. (95% C.I.)      |
| All internal causes              | MAXT      | 1.015 (1.000, 1.030) | 1.020 (1.005, 1.035) | 1.014 (0.999, 1.029) | 1.006 (0.991, 1.021) |
|                                  | MINT      | 1.008 (1.000, 1.017) | 1.008 (0.999, 1.017) | 1.009 (1.001, 1.018) | 1.010 (1.001, 1.019) |
|                                  | AVGT      | 1.007 (0.995, 1.020) | 1.009 (0.997, 1.022) | 1.004 (0.991, 1.016) | 1.001 (0.989, 1.014) |
|                                  | MAXAT     | 0.996 (0.981, 1.010) | 0.994 (0.979, 1.009) | 0.990 (0.976, 1.005) | 0.989 (0.974, 1.003) |
|                                  | MINAT     | 1.012 (0.999, 1.025) | 1.012 (0.998, 1.025) | 1.003 (0.989, 1.016) | 1.004 (0.991, 1.017) |
|                                  | AVGAT     | 1.004 (0.991, 1.017) | 1.005 (0.992, 1.018) | 0.995 (0.982, 1.008) | 0.993 (0.980, 1.006) |
| Fluid and electrolyte imbalance  | MAXT      | 1.060 (0.991, 1.134) | 0.950 (0.887, 1.017) | 1.036 (0.965, 1.112) | 1.017 (0.946, 1.094) |
|                                  | MINT      | 1.041 (0.998, 1.086) | 1.008 (0.966, 1.052) | 0.999 (0.956, 1.043) | 0.982 (0.940, 1.027) |
|                                  | AVGT      | 1.021 (0.964, 1.082) | 0.972 (0.917, 1.031) | 0.961 (0.904, 1.021) | 0.946 (0.889, 1.007) |
|                                  | MAXAT     | 1.008 (0.942, 1.078) | 0.940 (0.878, 1.007) | 0.920 (0.857, 0.988) | 0.940 (0.874, 1.011) |
|                                  | MINAT     | 0.978 (0.918, 1.042) | 0.983 (0.922, 1.048) | 0.996 (0.933, 1.063) | 0.987 (0.924, 1.055) |
|                                  | AVGAT     | 1.012 (0.952, 1.076) | 0.961 (0.902, 1.023) | 0.902 (0.845, 0.963) | 0.918 (0.859, 0.980) |
| All renal disease                | MAXT      | 1.044 (0.995, 1.095) | 0.996 (0.949, 1.045) | 1.028 (0.980, 1.079) | 1.042 (0.992, 1.094) |
|                                  | MINT      | 1.024 (0.995, 1.054) | 1.026 (0.997, 1.056) | 1.029 (1.000, 1.060) | 1.020 (0.991, 1.051) |
|                                  | AVGT      | 1.035 (0.994, 1.078) | 1.035 (0.994, 1.078) | 1.011 (0.971, 1.052) | 1.010 (0.969, 1.052) |
|                                  | MAXAT     | 1.044 (0.995, 1.095) | 0.981 (0.935, 1.029) | 1.002 (0.955, 1.051) | 1.021 (0.973, 1.072) |
|                                  | MINAT     | 1.025 (0.982, 1.070) | 1.030 (0.987, 1.076) | 0.999 (0.957, 1.044) | 1.009 (0.966, 1.054) |
|                                  | AVGAT     | 1.031 (0.988, 1.076) | 1.038 (0.995, 1.083) | 1.035 (0.991, 1.080) | 1.011 (0.968, 1.056) |
| Nephritis and nephrotic syndrome | MAXT      | 1.035 (0.931, 1.150) | 0.974 (0.879, 1.080) | 1.078 (0.970, 1.197) | 1.080 (0.969, 1.204) |
|                                  | MINT      | 1.066 (1.000, 1.136) | 1.035 (0.970, 1.104) | 1.032 (0.967, 1.101) | 1.036 (0.971, 1.106) |
|                                  | AVGT      | 1.018 (0.933, 1.112) | 0.951 (0.871, 1.039) | 0.985 (0.901, 1.078) | 1.025 (0.937, 1.122) |
|                                  | MAXAT     | 1.086 (0.978, 1.206) | 0.980 (0.881, 1.090) | 1.038 (0.932, 1.156) | 0.971 (0.870, 1.083) |
|                                  | MINAT     | 1.037 (0.944, 1.140) | 1.063 (0.968, 1.167) | 1.012 (0.919, 1.114) | 0.973 (0.883, 1.073) |
|                                  | AVGAT     | 1.037 (0.946, 1.137) | 1.058 (0.964, 1.160) | 1.041 (0.947, 1.144) | 0.927 (0.842, 1.021) |
| Acute renal failure              | MAXT      | 1.058 (0.947, 1.182) | 0.974 (0.873, 1.086) | 1.079 (0.966, 1.206) | 1.095 (0.976, 1.229) |
|                                  | MINT      | 1.071 (1.001, 1.146) | 1.035 (0.967, 1.108) | 1.042 (0.973, 1.116) | 1.053 (0.983, 1.129) |
|                                  | AVGT      | 1.058 (0.965, 1.160) | 0.963 (0.878, 1.056) | 0.968 (0.880, 1.064) | 1.030 (0.937, 1.133) |
|                                  | MAXAT     | 1.154 (1.034, 1.288) | 1.008 (0.901, 1.126) | 1.016 (0.906, 1.138) | 0.958 (0.853, 1.076) |
|                                  | MINAT     | 1.044 (0.945, 1.153) | 1.090 (0.988, 1.203) | 1.037 (0.937, 1.147) | 0.989 (0.893, 1.096) |
|                                  | AVGAT     | 1.066 (0.968, 1.174) | 1.096 (0.995, 1.207) | 1.027 (0.930, 1.135) | 0.918 (0.829, 1.016) |

Table S2-continued

| Outcome                        | Heat Wave | lag0                 | lag1                 | lag2                 | lag3                 |
|--------------------------------|-----------|----------------------|----------------------|----------------------|----------------------|
|                                |           | R.R. (95% C.I.)      | R.R. (95% C.I.)      | R.R. (95% C.I.)      | R.R. (95% C.I.)      |
| All circulatory system disease | MAXT      | 1.014 (0.998, 1.030) | 1.005 (0.990, 1.021) | 1.014 (0.998, 1.030) | 0.996 (0.980, 1.012) |
|                                | MINT      | 1.011 (1.002, 1.021) | 1.014 (1.005, 1.024) | 1.004 (0.995, 1.013) | 1.006 (0.996, 1.015) |
|                                | AVGT      | 1.007 (0.994, 1.020) | 0.999 (0.986, 1.012) | 1.002 (0.989, 1.015) | 0.995 (0.982, 1.009) |
|                                | MAXAT     | 0.996 (0.981, 1.012) | 1.007 (0.991, 1.023) | 0.999 (0.983, 1.014) | 0.989 (0.974, 1.004) |
|                                | MINAT     | 1.008 (0.994, 1.022) | 1.003 (0.990, 1.017) | 0.999 (0.986, 1.014) | 1.006 (0.992, 1.020) |
|                                | AVGAT     | 1.007 (0.993, 1.020) | 1.014 (1.001, 1.028) | 0.996 (0.982, 1.010) | 0.991 (0.977, 1.005) |
| Hypertension                   | MAXT      | 1.022 (1.005, 1.040) | 1.008 (0.991, 1.026) | 1.015 (0.998, 1.033) | 0.997 (0.979, 1.014) |
|                                | MINT      | 1.008 (0.997, 1.018) | 1.017 (1.006, 1.027) | 1.003 (0.993, 1.014) | 1.008 (0.997, 1.018) |
|                                | AVGT      | 1.005 (0.991, 1.020) | 0.999 (0.984, 1.013) | 1.003 (0.988, 1.017) | 0.998 (0.984, 1.013) |
|                                | MAXAT     | 0.998 (0.981, 1.015) | 1.008 (0.991, 1.026) | 1.000 (0.983, 1.017) | 0.987 (0.970, 1.004) |
|                                | MINAT     | 1.006 (0.991, 1.022) | 1.006 (0.991, 1.022) | 0.997 (0.982, 1.013) | 1.008 (0.993, 1.024) |
|                                | AVGAT     | 1.003 (0.988, 1.019) | 1.013 (0.998, 1.029) | 0.990 (0.975, 1.005) | 0.992 (0.977, 1.007) |
| Ischemic heart disease         | MAXT      | 1.011 (0.980, 1.042) | 0.994 (0.964, 1.025) | 1.032 (1.001, 1.064) | 0.963 (0.934, 0.994) |
|                                | MINT      | 1.018 (1.000, 1.037) | 1.021 (1.003, 1.040) | 0.998 (0.980, 1.016) | 0.999 (0.981, 1.017) |
|                                | AVGT      | 1.015 (0.989, 1.041) | 0.991 (0.966, 1.016) | 1.011 (0.986, 1.037) | 0.988 (0.963, 1.013) |
|                                | MAXAT     | 0.997 (0.967, 1.027) | 0.986 (0.957, 1.017) | 1.011 (0.981, 1.042) | 0.963 (0.935, 0.993) |
|                                | MINAT     | 0.994 (0.968, 1.021) | 0.994 (0.968, 1.022) | 0.997 (0.971, 1.025) | 1.005 (0.978, 1.033) |
|                                | AVGAT     | 1.002 (0.976, 1.029) | 0.997 (0.970, 1.024) | 0.998 (0.972, 1.025) | 0.975 (0.950, 1.002) |
| Dysrhythmia                    | MAXT      | 0.997 (0.964, 1.031) | 0.986 (0.954, 1.020) | 1.014 (0.981, 1.049) | 0.996 (0.962, 1.030) |
|                                | MINT      | 1.020 (1.000, 1.040) | 1.008 (0.988, 1.028) | 1.001 (0.981, 1.021) | 0.999 (0.979, 1.019) |
|                                | AVGT      | 1.001 (0.973, 1.029) | 0.980 (0.953, 1.007) | 1.008 (0.980, 1.036) | 0.993 (0.966, 1.022) |
|                                | MAXAT     | 0.971 (0.940, 1.004) | 0.989 (0.957, 1.023) | 0.995 (0.962, 1.028) | 1.029 (0.995, 1.063) |
|                                | MINAT     | 1.007 (0.978, 1.037) | 0.985 (0.956, 1.014) | 0.984 (0.955, 1.014) | 0.976 (0.948, 1.006) |
|                                | AVGAT     | 0.990 (0.961, 1.019) | 1.016 (0.987, 1.046) | 1.013 (0.984, 1.043) | 1.003 (0.974, 1.033) |
| Congestive heart failure       | MAXT      | 0.985 (0.948, 1.024) | 0.977 (0.940, 1.015) | 1.001 (0.963, 1.040) | 0.931 (0.896, 0.968) |
|                                | MINT      | 1.010 (0.987, 1.033) | 1.023 (1.000, 1.047) | 0.998 (0.975, 1.021) | 1.005 (0.983, 1.028) |
|                                | AVGT      | 0.968 (0.938, 1.000) | 0.998 (0.966, 1.030) | 1.013 (0.981, 1.046) | 0.981 (0.950, 1.013) |
|                                | MAXAT     | 0.979 (0.943, 1.017) | 1.005 (0.967, 1.044) | 0.983 (0.946, 1.021) | 0.946 (0.911, 0.982) |
|                                | MINAT     | 1.010 (0.977, 1.045) | 0.987 (0.954, 1.021) | 0.996 (0.962, 1.030) | 1.022 (0.988, 1.058) |
|                                | AVGAT     | 1.006 (0.973, 1.040) | 1.005 (0.971, 1.039) | 0.991 (0.959, 1.025) | 0.987 (0.955, 1.021) |
| Ischemic stroke                | MAXT      | 1.095 (1.024, 1.172) | 1.049 (0.981, 1.122) | 1.028 (0.961, 1.100) | 1.033 (0.965, 1.105) |
|                                | MINT      | 1.026 (0.986, 1.068) | 1.004 (0.965, 1.045) | 1.019 (0.979, 1.060) | 0.992 (0.953, 1.033) |
|                                | AVGT      | 1.033 (0.977, 1.092) | 1.017 (0.961, 1.075) | 1.022 (0.966, 1.082) | 0.997 (0.943, 1.055) |
|                                | MAXAT     | 1.063 (0.996, 1.136) | 0.998 (0.933, 1.066) | 0.939 (0.878, 1.005) | 1.003 (0.939, 1.072) |
|                                | MINAT     | 1.023 (0.964, 1.085) | 1.052 (0.992, 1.115) | 1.006 (0.948, 1.068) | 0.976 (0.919, 1.036) |
|                                | AVGAT     | 1.025 (0.967, 1.087) | 1.024 (0.965, 1.086) | 0.991 (0.933, 1.051) | 0.987 (0.931, 1.048) |

Table S2-continued

| Outcome                               | Heat Wave | lag0                 | lag1                 | lag2                 | lag3                 |
|---------------------------------------|-----------|----------------------|----------------------|----------------------|----------------------|
|                                       |           | R.R. (95% C.I.)      | R.R. (95% C.I.)      | R.R. (95% C.I.)      | R.R. (95% C.I.)      |
| All respiratory system disease        | MAXT      | 1.022 (0.982, 1.063) | 1.044 (1.003, 1.086) | 1.017 (0.977, 1.058) | 1.016 (0.976, 1.057) |
|                                       | MINT      | 1.002 (0.978, 1.026) | 1.002 (0.978, 1.026) | 0.988 (0.965, 1.012) | 0.990 (0.966, 1.013) |
|                                       | AVGT      | 0.999 (0.966, 1.034) | 1.006 (0.973, 1.041) | 0.987 (0.955, 1.021) | 0.990 (0.958, 1.024) |
|                                       | MAXAT     | 0.963 (0.925, 1.003) | 0.967 (0.929, 1.007) | 0.963 (0.925, 1.002) | 0.952 (0.915, 0.990) |
|                                       | MINAT     | 1.009 (0.973, 1.045) | 1.004 (0.969, 1.041) | 0.984 (0.949, 1.019) | 0.994 (0.959, 1.030) |
|                                       | AVGAT     | 0.983 (0.948, 1.019) | 0.982 (0.947, 1.018) | 0.975 (0.941, 1.011) | 0.975 (0.940, 1.010) |
| Pneumonia                             | MAXT      | 1.008 (0.940, 1.081) | 0.972 (0.906, 1.042) | 1.010 (0.942, 1.083) | 1.048 (0.978, 1.123) |
|                                       | MINT      | 0.997 (0.956, 1.039) | 0.985 (0.945, 1.026) | 0.990 (0.950, 1.032) | 0.975 (0.936, 1.017) |
|                                       | AVGT      | 0.965 (0.909, 1.023) | 0.979 (0.923, 1.038) | 0.942 (0.888, 0.999) | 0.987 (0.931, 1.047) |
|                                       | MAXAT     | 0.948 (0.883, 1.017) | 0.949 (0.885, 1.017) | 0.928 (0.866, 0.995) | 0.970 (0.905, 1.039) |
|                                       | MINAT     | 0.968 (0.909, 1.030) | 1.028 (0.966, 1.094) | 1.006 (0.946, 1.071) | 0.981 (0.921, 1.044) |
|                                       | AVGAT     | 0.966 (0.907, 1.029) | 0.991 (0.931, 1.055) | 0.984 (0.925, 1.048) | 0.981 (0.922, 1.045) |
| Chronic obstructive pulmonary disease | MAXT      | 1.025 (0.986, 1.066) | 1.009 (0.970, 1.049) | 1.023 (0.984, 1.064) | 0.978 (0.940, 1.018) |
|                                       | MINT      | 1.022 (0.998, 1.045) | 1.014 (0.990, 1.037) | 0.996 (0.973, 1.019) | 0.999 (0.976, 1.022) |
|                                       | AVGT      | 1.018 (0.986, 1.051) | 0.986 (0.955, 1.019) | 0.989 (0.957, 1.021) | 0.976 (0.945, 1.008) |
|                                       | MAXAT     | 0.991 (0.954, 1.030) | 0.984 (0.947, 1.023) | 1.011 (0.973, 1.051) | 0.948 (0.912, 0.985) |
|                                       | MINAT     | 1.016 (0.982, 1.051) | 1.009 (0.974, 1.044) | 0.978 (0.945, 1.013) | 1.022 (0.987, 1.058) |
|                                       | AVGAT     | 0.982 (0.949, 1.016) | 1.001 (0.967, 1.036) | 0.995 (0.962, 1.030) | 0.989 (0.956, 1.024) |
| Asthma/wheeze                         | MAXT      | 1.018 (0.954, 1.086) | 1.038 (0.973, 1.108) | 1.065 (0.999, 1.136) | 1.012 (0.949, 1.079) |
|                                       | MINT      | 0.971 (0.934, 1.010) | 0.979 (0.942, 1.017) | 0.989 (0.952, 1.028) | 1.002 (0.965, 1.042) |
|                                       | AVGT      | 0.921 (0.871, 0.974) | 0.967 (0.915, 1.022) | 0.997 (0.944, 1.053) | 0.996 (0.943, 1.051) |
|                                       | MAXAT     | 0.919 (0.860, 0.982) | 0.926 (0.867, 0.989) | 0.941 (0.882, 1.004) | 0.924 (0.866, 0.985) |
|                                       | MINAT     | 0.998 (0.942, 1.058) | 0.964 (0.909, 1.022) | 0.964 (0.909, 1.021) | 0.993 (0.937, 1.051) |
|                                       | AVGAT     | 0.970 (0.914, 1.028) | 0.967 (0.912, 1.025) | 0.960 (0.905, 1.018) | 0.975 (0.920, 1.033) |
| Diabetes mellitus                     | MAXT      | 0.962 (0.901, 1.027) | 1.020 (0.956, 1.088) | 1.083 (1.015, 1.155) | 1.002 (0.937, 1.071) |
|                                       | MINT      | 0.973 (0.935, 1.011) | 0.995 (0.957, 1.034) | 1.020 (0.981, 1.061) | 0.984 (0.947, 1.023) |
|                                       | AVGT      | 0.985 (0.932, 1.040) | 0.992 (0.939, 1.047) | 1.025 (0.970, 1.082) | 0.924 (0.874, 0.977) |
|                                       | MAXAT     | 0.987 (0.926, 1.053) | 1.033 (0.968, 1.102) | 1.006 (0.943, 1.074) | 0.946 (0.886, 1.010) |
|                                       | MINAT     | 1.042 (0.983, 1.104) | 0.999 (0.942, 1.058) | 1.021 (0.962, 1.082) | 0.961 (0.906, 1.019) |
|                                       | AVGAT     | 1.010 (0.954, 1.070) | 0.965 (0.911, 1.022) | 1.055 (0.995, 1.118) | 0.949 (0.895, 1.006) |
| Intestinal infection                  | MAXT      | 0.976 (0.876, 1.089) | 1.051 (0.942, 1.173) | 1.109 (0.994, 1.236) | 1.030 (0.922, 1.150) |
|                                       | MINT      | 1.081 (1.011, 1.156) | 1.032 (0.965, 1.103) | 1.007 (0.941, 1.077) | 0.971 (0.907, 1.040) |
|                                       | AVGT      | 1.020 (0.930, 1.120) | 1.102 (1.005, 1.208) | 1.040 (0.948, 1.140) | 1.043 (0.950, 1.145) |
|                                       | MAXAT     | 0.994 (0.889, 1.110) | 1.004 (0.899, 1.121) | 1.088 (0.975, 1.214) | 1.064 (0.953, 1.187) |
|                                       | MINAT     | 0.968 (0.876, 1.070) | 1.053 (0.954, 1.162) | 1.002 (0.909, 1.106) | 0.991 (0.897, 1.095) |
|                                       | AVGAT     | 1.027 (0.930, 1.134) | 1.052 (0.954, 1.161) | 1.038 (0.941, 1.145) | 1.009 (0.914, 1.114) |

**Table S3.** Relative risk (RR) estimates and 95% confidence interval (CI) for ED visits associated with different order of days within a heat wave period during May to September in Atlanta, 1993-2012. Heat waves are defined as periods of  $\geq 2$  consecutive days with temperature (T) or apparent temperature (AT) exceeding the 98<sup>th</sup> percentile using daily maximum (MAX), minimum (MIN), or average (AVG). The first day of the heat wave period is considered a non-heat day.

| Outcome                          | Day | MAXT lag0<br>R.R. (95% C.I.) | MAXT lag1<br>R.R. (95% C.I.) | MINT lag 0<br>R.R. (95% C.I.) | MINT lag1<br>R.R. (95% C.I.) |
|----------------------------------|-----|------------------------------|------------------------------|-------------------------------|------------------------------|
| All internal causes              | 2   | 1.00 (0.99, 1.02)            | 1.01 (0.99, 1.03)            | 1.01 (1.00, 1.02)             | 1.00 (0.99, 1.01)            |
|                                  | 3   | 1.02 (0.99, 1.05)            | 1.01 (0.99, 1.03)            | 1.00 (0.98, 1.01)             | 1.01 (1.00, 1.03)            |
|                                  | 4   | 1.03 (1.00, 1.06)            | 1.02 (0.99, 1.05)            | 1.01 (1.00, 1.03)             | 1.01 (1.00, 1.03)            |
|                                  | >4  | 1.02 (1.00, 1.05)            | 1.00 (0.98, 1.02)            | 1.01 (1.00, 1.03)             | 1.01 (1.00, 1.02)            |
| Fluid and electrolyte imbalance  | 2   | 1.07 (0.98, 1.16)            | 0.96 (0.88, 1.04)            | 1.05 (0.99, 1.11)             | 1.04 (0.98, 1.09)            |
|                                  | 3   | 0.95 (0.84, 1.08)            | 1.08 (0.97, 1.21)            | 1.07 (1.00, 1.14)             | 1.07 (1.00, 1.14)            |
|                                  | 4   | 1.11 (0.96, 1.27)            | 1.11 (0.97, 1.28)            | 1.04 (0.95, 1.12)             | 1.06 (0.98, 1.15)            |
|                                  | >4  | 1.08 (0.97, 1.20)            | 1.05 (0.95, 1.16)            | 1.01 (0.95, 1.08)             | 0.99 (0.93, 1.04)            |
| All renal diseases               | 2   | 1.05 (0.99, 1.11)            | 0.99 (0.94, 1.05)            | 1.01 (0.98, 1.06)             | 1.03 (1.00, 1.07)            |
|                                  | 3   | 0.98 (0.90, 1.08)            | 0.98 (0.91, 1.07)            | 1.03 (0.98, 1.08)             | 1.03 (0.98, 1.07)            |
|                                  | 4   | 1.02 (0.92, 1.13)            | 1.09 (0.99, 1.20)            | 1.01 (0.95, 1.07)             | 1.07 (1.02, 1.13)            |
|                                  | >4  | 1.08 (1.01, 1.16)            | 1.03 (0.96, 1.10)            | 1.04 (1.00, 1.08)             | 1.04 (1.00, 1.08)            |
| Nephritis and nephrotic syndrome | 2   | 1.01 (0.89, 1.16)            | 1.07 (0.95, 1.22)            | 1.05 (0.96, 1.15)             | 1.06 (0.98, 1.15)            |
|                                  | 3   | 1.03 (0.84, 1.27)            | 1.05 (0.87, 1.27)            | 1.07 (0.97, 1.19)             | 1.03 (0.93, 1.14)            |
|                                  | 4   | 0.95 (0.76, 1.19)            | 1.17 (0.95, 1.44)            | 1.10 (0.97, 1.24)             | 1.12 (1.00, 1.26)            |
|                                  | >4  | 1.11 (0.95, 1.30)            | 1.02 (0.88, 1.19)            | 1.07 (0.98, 1.17)             | 1.06 (0.98, 1.14)            |
| Acute renal failure              | 2   | 1.03 (0.89, 1.18)            | 1.06 (0.93, 1.21)            | 1.06 (0.97, 1.16)             | 1.07 (0.98, 1.17)            |
|                                  | 3   | 1.07 (0.86, 1.34)            | 1.13 (0.92, 1.38)            | 1.07 (0.95, 1.19)             | 1.03 (0.93, 1.15)            |
|                                  | 4   | 1.03 (0.82, 1.29)            | 1.19 (0.96, 1.48)            | 1.10 (0.96, 1.25)             | 1.17 (1.04, 1.31)            |
|                                  | >4  | 1.13 (0.96, 1.33)            | 1.03 (0.88, 1.21)            | 1.08 (0.99, 1.19)             | 1.06 (0.97, 1.15)            |
| All circulatory system disease   | 2   | 1.01 (0.99, 1.03)            | 0.99 (0.97, 1.01)            | 1.00 (0.99, 1.02)             | 1.01 (1.00, 1.02)            |
|                                  | 3   | 1.01 (0.98, 1.04)            | 1.02 (0.99, 1.05)            | 1.01 (1.00, 1.03)             | 1.01 (1.00, 1.03)            |
|                                  | 4   | 1.03 (1.00, 1.07)            | 1.02 (0.99, 1.05)            | 1.02 (1.00, 1.04)             | 1.02 (1.00, 1.03)            |
|                                  | >4  | 1.02 (0.99, 1.04)            | 1.00 (0.98, 1.03)            | 1.02 (1.01, 1.03)             | 1.01 (1.00, 1.02)            |
| Hypertension                     | 2   | 1.02 (1.00, 1.04)            | 0.99 (0.97, 1.02)            | 1.00 (0.99, 1.01)             | 1.01 (0.99, 1.02)            |
|                                  | 3   | 1.02 (0.98, 1.05)            | 1.02 (0.99, 1.06)            | 1.01 (0.99, 1.02)             | 1.01 (1.00, 1.03)            |
|                                  | 4   | 1.04 (1.00, 1.08)            | 1.01 (0.97, 1.05)            | 1.02 (1.00, 1.04)             | 1.02 (1.00, 1.04)            |
|                                  | >4  | 1.02 (1.00, 1.05)            | 1.01 (0.98, 1.03)            | 1.02 (1.00, 1.03)             | 1.01 (1.00, 1.03)            |
| Ischemic heart disease           | 2   | 1.02 (0.98, 1.06)            | 0.98 (0.94, 1.02)            | 1.01 (0.98, 1.03)             | 1.03 (1.00, 1.05)            |
|                                  | 3   | 0.98 (0.93, 1.04)            | 1.05 (0.99, 1.10)            | 1.04 (1.01, 1.07)             | 1.00 (0.97, 1.03)            |
|                                  | 4   | 1.04 (0.97, 1.11)            | 1.01 (0.95, 1.08)            | 1.02 (0.98, 1.06)             | 1.02 (0.99, 1.06)            |
|                                  | >4  | 0.99 (0.94, 1.03)            | 0.99 (0.94, 1.04)            | 1.02 (0.99, 1.04)             | 1.01 (0.99, 1.03)            |

Table S3-continued

| Outcome                               | Day | MAXT lag0         | MAXT lag1         | MINT lag 0        | MINT lag1         |
|---------------------------------------|-----|-------------------|-------------------|-------------------|-------------------|
|                                       |     | R.R. (95% C.I.)   | R.R. (95% C.I.)   | R.R. (95% C.I.)   | R.R. (95% C.I.)   |
| Dysrhythmia                           | 2   | 1.00 (0.96, 1.05) | 0.97 (0.93, 1.01) | 1.02 (0.99, 1.05) | 1.01 (0.98, 1.03) |
|                                       | 3   | 0.97 (0.90, 1.03) | 1.04 (0.98, 1.10) | 1.02 (0.99, 1.05) | 1.01 (0.98, 1.04) |
|                                       | 4   | 1.02 (0.95, 1.10) | 1.00 (0.94, 1.08) | 1.03 (0.99, 1.07) | 1.02 (0.98, 1.05) |
|                                       | >4  | 0.99 (0.94, 1.05) | 0.98 (0.94, 1.04) | 1.02 (0.99, 1.05) | 1.00 (0.98, 1.03) |
| Congestive heart failure              | 2   | 1.02 (0.94, 1.10) | 0.94 (0.86, 1.02) | 1.00 (0.97, 1.03) | 1.01 (0.99, 1.04) |
|                                       | 3   | 0.98 (0.92, 1.04) | 0.96 (0.90, 1.02) | 1.02 (0.98, 1.06) | 1.00 (0.97, 1.04) |
|                                       | 4   | 1.00 (0.97, 1.03) | 1.01 (0.99, 1.04) | 1.00 (0.96, 1.05) | 1.02 (0.98, 1.07) |
|                                       | >4  | 1.02 (0.94, 1.10) | 0.94 (0.86, 1.02) | 1.01 (0.98, 1.05) | 1.01 (0.98, 1.04) |
| Ischemic stroke                       | 2   | 1.07 (0.98, 1.16) | 1.02 (0.94, 1.10) | 1.04 (0.98, 1.09) | 1.00 (0.95, 1.05) |
|                                       | 3   | 1.06 (0.93, 1.20) | 1.03 (0.92, 1.16) | 1.00 (0.94, 1.07) | 1.04 (0.98, 1.11) |
|                                       | 4   | 1.16 (1.01, 1.34) | 1.17 (1.02, 1.34) | 1.10 (1.01, 1.18) | 1.03 (0.96, 1.11) |
|                                       | >4  | 1.13 (1.02, 1.26) | 1.10 (0.99, 1.21) | 1.01 (0.95, 1.06) | 0.98 (0.93, 1.03) |
| All respiratory system disease        | 2   | 1.00 (0.95, 1.05) | 1.02 (0.97, 1.07) | 1.01 (0.98, 1.04) | 1.00 (0.97, 1.03) |
|                                       | 3   | 1.01 (0.94, 1.09) | 1.01 (0.94, 1.07) | 0.99 (0.96, 1.03) | 1.00 (0.97, 1.04) |
|                                       | 4   | 1.01 (0.92, 1.10) | 1.03 (0.94, 1.12) | 1.01 (0.97, 1.06) | 1.00 (0.96, 1.05) |
|                                       | >4  | 1.07 (1.01, 1.14) | 1.07 (1.01, 1.13) | 0.99 (0.96, 1.03) | 1.00 (0.97, 1.03) |
| Pneumonia                             | 2   | 1.01 (0.93, 1.11) | 0.94 (0.86, 1.03) | 1.03 (0.97, 1.09) | 0.98 (0.93, 1.04) |
|                                       | 3   | 0.94 (0.83, 1.07) | 1.02 (0.91, 1.14) | 0.97 (0.90, 1.03) | 1.04 (0.97, 1.10) |
|                                       | 4   | 1.06 (0.92, 1.23) | 1.04 (0.90, 1.20) | 0.99 (0.91, 1.07) | 1.01 (0.93, 1.09) |
|                                       | >4  | 1.01 (0.91, 1.12) | 0.96 (0.87, 1.06) | 0.98 (0.92, 1.04) | 0.98 (0.93, 1.04) |
| Chronic obstructive pulmonary disease | 2   | 1.02 (0.97, 1.07) | 1.02 (0.97, 1.06) | 1.01 (0.98, 1.04) | 1.00 (0.97, 1.03) |
|                                       | 3   | 1.06 (0.98, 1.14) | 1.01 (0.94, 1.08) | 1.03 (0.99, 1.06) | 1.03 (1.00, 1.07) |
|                                       | 4   | 1.02 (0.94, 1.11) | 1.02 (0.93, 1.10) | 1.04 (1.00, 1.09) | 0.99 (0.94, 1.03) |
|                                       | >4  | 1.01 (0.95, 1.08) | 0.98 (0.92, 1.04) | 1.02 (0.99, 1.06) | 1.02 (0.99, 1.05) |
| Asthma/wheeze                         | 2   | 0.96 (0.88, 1.05) | 0.99 (0.91, 1.07) | 0.98 (0.93, 1.03) | 0.98 (0.93, 1.03) |
|                                       | 3   | 1.00 (0.89, 1.13) | 0.98 (0.88, 1.08) | 0.96 (0.90, 1.03) | 0.99 (0.93, 1.05) |
|                                       | 4   | 1.01 (0.88, 1.16) | 1.00 (0.88, 1.15) | 0.98 (0.91, 1.06) | 0.96 (0.89, 1.04) |
|                                       | >4  | 1.10 (1.01, 1.21) | 1.07 (0.99, 1.16) | 0.96 (0.91, 1.02) | 0.99 (0.95, 1.04) |
| Diabetes mellitus                     | 2   | 0.92 (0.85, 1.01) | 1.02 (0.94, 1.10) | 0.97 (0.92, 1.02) | 1.00 (0.95, 1.05) |
|                                       | 3   | 1.03 (0.92, 1.17) | 1.07 (0.96, 1.20) | 0.96 (0.90, 1.02) | 0.99 (0.93, 1.05) |
|                                       | 4   | 1.05 (0.92, 1.20) | 0.98 (0.85, 1.13) | 0.97 (0.90, 1.05) | 1.00 (0.93, 1.07) |
|                                       | >4  | 0.94 (0.85, 1.05) | 0.98 (0.89, 1.09) | 0.99 (0.94, 1.05) | 1.02 (0.97, 1.07) |
| Intestinal infection                  | 2   | 0.95 (0.83, 1.10) | 0.94 (0.81, 1.08) | 1.05 (0.96, 1.15) | 1.05 (0.96, 1.14) |
|                                       | 3   | 0.85 (0.69, 1.06) | 1.02 (0.85, 1.23) | 1.16 (1.04, 1.29) | 1.07 (0.96, 1.18) |
|                                       | 4   | 0.93 (0.73, 1.17) | 0.98 (0.78, 1.24) | 1.15 (1.01, 1.31) | 1.02 (0.90, 1.16) |
|                                       | >4  | 1.09 (0.93, 1.27) | 1.14 (0.99, 1.32) | 1.05 (0.95, 1.15) | 1.05 (0.97, 1.14) |



**Table S4.** Relative risk (RR) estimates and 95% confidence interval (CI) for ED visits associated with different order of heat wave periods within a year during May to September in Atlanta, 1993-2012. Heat waves are defined as periods of  $\geq 2$  consecutive days with temperature (T) or apparent temperature (AT) exceeding the 98<sup>th</sup> percentile using daily maximum (MAX), minimum (MIN), or average (AVG). The first day of the heat wave period is considered a non-heat day.

| Outcome                          | Sequence | MAXT lag0<br>R.R. (95% C.I.) | MAXT lag1<br>R.R. (95% C.I.) | MINT lag 0<br>R.R. (95% C.I.) | MINT lag1<br>R.R. (95% C.I.) |
|----------------------------------|----------|------------------------------|------------------------------|-------------------------------|------------------------------|
| All internal causes              | 1        | 1.02 (1.00, 1.04)            | 1.01 (0.99, 1.03)            | 1.01 (1.00, 1.02)             | 1.00 (0.99, 1.01)            |
|                                  | 2        | 1.00 (0.98, 1.02)            | 1.00 (0.98, 1.01)            | 1.03 (1.01, 1.04)             | 1.01 (1.00, 1.02)            |
|                                  | $\geq 3$ | 1.03 (1.01, 1.05)            | 1.02 (1.00, 1.04)            | 1.02 (1.01, 1.03)             | 1.01 (1.00, 1.02)            |
| Fluid and electrolyte imbalance  | 1        | 1.04 (0.94, 1.14)            | 1.02 (0.93, 1.12)            | 1.12 (1.06, 1.19)             | 1.14 (1.08, 1.21)            |
|                                  | 2        | 1.04 (0.96, 1.13)            | 1.05 (0.97, 1.13)            | 1.12 (1.05, 1.20)             | 1.08 (1.01, 1.15)            |
|                                  | $\geq 3$ | 1.09 (1.00, 1.19)            | 1.08 (0.99, 1.17)            | 1.02 (0.97, 1.07)             | 0.99 (0.95, 1.03)            |
| All renal diseases               | 1        | 1.04 (0.97, 1.11)            | 1.03 (0.96, 1.09)            | 1.02 (0.98, 1.06)             | 1.02 (0.99, 1.07)            |
|                                  | 2        | 1.03 (0.97, 1.09)            | 1.03 (0.97, 1.08)            | 1.04 (1.00, 1.10)             | 1.08 (1.03, 1.13)            |
|                                  | $\geq 3$ | 1.06 (1.00, 1.13)            | 1.03 (0.97, 1.10)            | 1.02 (0.99, 1.06)             | 1.03 (1.00, 1.06)            |
| Nephritis and nephrotic syndrome | 1        | 0.86 (0.74, 1.01)            | 1.07 (0.93, 1.23)            | 1.12 (1.02, 1.23)             | 1.12 (1.03, 1.22)            |
|                                  | 2        | 1.00 (0.88, 1.13)            | 1.03 (0.91, 1.16)            | 1.07 (0.96, 1.19)             | 1.08 (0.98, 1.20)            |
|                                  | $\geq 3$ | 1.08 (0.95, 1.23)            | 1.08 (0.95, 1.22)            | 1.06 (0.99, 1.13)             | 1.05 (0.98, 1.12)            |
| Acute renal failure              | 1        | 0.88 (0.74, 1.03)            | 1.06 (0.92, 1.23)            | 1.14 (1.04, 1.26)             | 1.14 (1.04, 1.25)            |
|                                  | 2        | 1.02 (0.89, 1.16)            | 1.02 (0.90, 1.16)            | 1.09 (0.97, 1.22)             | 1.12 (1.01, 1.25)            |
|                                  | $\geq 3$ | 1.15 (1.01, 1.32)            | 1.12 (0.99, 1.28)            | 1.06 (0.99, 1.14)             | 1.05 (0.98, 1.12)            |
| All circulatory system disease   | 1        | 1.00 (0.98, 1.03)            | 1.00 (0.98, 1.02)            | 1.02 (1.00, 1.03)             | 1.01 (1.00, 1.02)            |
|                                  | 2        | 1.01 (0.99, 1.03)            | 1.01 (0.99, 1.02)            | 1.02 (1.00, 1.03)             | 1.01 (0.99, 1.02)            |
|                                  | $\geq 3$ | 1.02 (1.00, 1.04)            | 1.01 (0.99, 1.02)            | 1.01 (1.00, 1.02)             | 1.01 (1.00, 1.02)            |
| Hypertension                     | 1        | 1.01 (0.98, 1.03)            | 1.00 (0.98, 1.02)            | 1.02 (1.00, 1.03)             | 1.01 (0.99, 1.02)            |
|                                  | 2        | 1.02 (1.00, 1.04)            | 1.02 (1.00, 1.04)            | 1.02 (1.00, 1.03)             | 1.01 (0.99, 1.02)            |
|                                  | $\geq 3$ | 1.02 (1.00, 1.04)            | 1.01 (0.99, 1.03)            | 1.01 (1.00, 1.02)             | 1.01 (1.00, 1.02)            |
| Ischemic heart disease           | 1        | 1.00 (0.96, 1.04)            | 1.00 (0.96, 1.04)            | 1.03 (1.00, 1.06)             | 1.02 (1.00, 1.05)            |
|                                  | 2        | 1.01 (0.98, 1.05)            | 1.02 (0.99, 1.06)            | 1.01 (0.98, 1.05)             | 1.01 (0.99, 1.04)            |
|                                  | $\geq 3$ | 0.99 (0.96, 1.03)            | 1.00 (0.96, 1.04)            | 1.00 (0.99, 1.02)             | 1.01 (0.99, 1.03)            |

Table S4-continued

| Outcome                               | Sequence | MAXT lag0         | MAXT lag1         | MINT lag 0        | MINT lag1         |
|---------------------------------------|----------|-------------------|-------------------|-------------------|-------------------|
|                                       |          | R.R. (95% C.I.)   | R.R. (95% C.I.)   | R.R. (95% C.I.)   | R.R. (95% C.I.)   |
| Dysrhythmia                           | 1        | 1.00 (0.96, 1.05) | 1.00 (0.95, 1.04) | 1.04 (1.01, 1.07) | 1.02 (0.99, 1.05) |
|                                       | 2        | 1.01 (0.97, 1.05) | 1.00 (0.96, 1.03) | 1.03 (0.99, 1.06) | 1.00 (0.97, 1.03) |
|                                       | $\geq 3$ | 1.01 (0.97, 1.05) | 0.99 (0.95, 1.03) | 1.02 (1.00, 1.04) | 1.01 (0.99, 1.03) |
| Congestive heart failure              | 1        | 0.98 (0.93, 1.04) | 0.98 (0.93, 1.04) | 1.02 (0.99, 1.06) | 1.02 (0.99, 1.05) |
|                                       | 2        | 0.99 (0.94, 1.03) | 0.96 (0.92, 1.00) | 0.99 (0.95, 1.03) | 0.99 (0.96, 1.03) |
|                                       | $\geq 3$ | 1.03 (0.98, 1.08) | 0.97 (0.93, 1.02) | 1.00 (0.98, 1.03) | 1.01 (0.99, 1.03) |
| Ischemic stroke                       | 1        | 1.03 (0.94, 1.14) | 1.00 (0.91, 1.09) | 1.02 (0.96, 1.08) | 1.01 (0.96, 1.07) |
|                                       | 2        | 1.13 (1.04, 1.22) | 1.08 (1.00, 1.16) | 1.04 (0.97, 1.11) | 1.04 (0.98, 1.10) |
|                                       | $\geq 3$ | 1.10 (1.01, 1.19) | 1.11 (1.02, 1.20) | 1.05 (1.00, 1.09) | 1.01 (0.98, 1.05) |
| All respiratory system disease        | 1        | 1.02 (0.96, 1.08) | 1.04 (0.99, 1.10) | 1.01 (0.97, 1.04) | 1.00 (0.97, 1.03) |
|                                       | 2        | 0.99 (0.94, 1.04) | 1.00 (0.96, 1.04) | 1.03 (0.99, 1.07) | 1.02 (0.98, 1.06) |
|                                       | $\geq 3$ | 1.02 (0.97, 1.08) | 1.03 (0.99, 1.09) | 1.01 (0.98, 1.03) | 1.00 (0.98, 1.02) |
| Pneumonia                             | 1        | 0.95 (0.87, 1.05) | 0.96 (0.87, 1.05) | 0.99 (0.94, 1.05) | 1.02 (0.96, 1.07) |
|                                       | 2        | 1.04 (0.96, 1.13) | 1.02 (0.95, 1.10) | 1.07 (1.01, 1.15) | 1.07 (1.01, 1.14) |
|                                       | $\geq 3$ | 0.99 (0.91, 1.09) | 0.96 (0.88, 1.05) | 0.98 (0.93, 1.02) | 0.99 (0.95, 1.03) |
| Chronic obstructive pulmonary disease | 1        | 1.01 (0.96, 1.07) | 0.99 (0.94, 1.04) | 1.02 (0.98, 1.05) | 1.01 (0.98, 1.05) |
|                                       | 2        | 1.07 (1.02, 1.12) | 1.06 (1.01, 1.10) | 1.01 (0.97, 1.05) | 1.00 (0.97, 1.04) |
|                                       | $\geq 3$ | 1.03 (0.98, 1.08) | 0.97 (0.93, 1.02) | 1.01 (0.98, 1.03) | 1.01 (0.99, 1.03) |
| Asthma/wheeze                         | 1        | 1.04 (0.94, 1.14) | 1.02 (0.93, 1.11) | 0.98 (0.93, 1.04) | 0.98 (0.93, 1.03) |
|                                       | 2        | 0.96 (0.89, 1.04) | 0.96 (0.89, 1.03) | 1.02 (0.96, 1.08) | 1.05 (0.99, 1.11) |
|                                       | $\geq 3$ | 0.99 (0.91, 1.07) | 1.01 (0.93, 1.08) | 0.97 (0.93, 1.01) | 0.96 (0.93, 1.00) |
| Diabetes mellitus                     | 1        | 1.00 (0.92, 1.10) | 0.97 (0.89, 1.06) | 1.01 (0.95, 1.07) | 1.01 (0.96, 1.06) |
|                                       | 2        | 0.96 (0.89, 1.04) | 1.00 (0.93, 1.08) | 1.00 (0.93, 1.06) | 1.04 (0.98, 1.10) |
|                                       | $\geq 3$ | 0.94 (0.87, 1.02) | 0.96 (0.89, 1.04) | 0.96 (0.92, 1.00) | 0.98 (0.94, 1.01) |
| Intestinal infection                  | 1        | 0.93 (0.80, 1.09) | 0.96 (0.83, 1.11) | 1.03 (0.93, 1.13) | 1.08 (0.99, 1.18) |
|                                       | 2        | 1.01 (0.89, 1.15) | 0.98 (0.87, 1.10) | 1.01 (0.90, 1.14) | 1.01 (0.91, 1.13) |
|                                       | $\geq 3$ | 1.02 (0.89, 1.18) | 1.07 (0.94, 1.23) | 1.07 (0.99, 1.15) | 1.05 (0.98, 1.12) |

**Table S5.** Relative risk (RR) estimates and 95% confidence interval (CI) for ED visits associated with per °C increase in average temperature during heat waves during May to September in Atlanta, 1993-2012. Heat waves are defined as periods of  $\geq 2$  consecutive days with temperature (T) or apparent temperature (AT) exceeding the 98<sup>th</sup> percentile using daily maximum (MAX), minimum (MIN), or average (AVG). The first day of the heat wave period is considered a non-heat day.

| Outcome                          | Heat Wave | lag0                    | lag1                    | lag2                    | lag3                    |
|----------------------------------|-----------|-------------------------|-------------------------|-------------------------|-------------------------|
|                                  |           | R.R. (95% C.I.)         | R.R. (95% C.I.)         | R.R. (95% C.I.)         | R.R. (95% C.I.)         |
| All internal causes              | MAXT      | 1.0004 (1.0000, 1.0008) | 1.0005 (1.0001, 1.0010) | 1.0004 (1.0000, 1.0008) | 1.0002 (0.9998, 1.0006) |
|                                  | MINT      | 1.0003 (1.0000, 1.0007) | 1.0003 (1.0000, 1.0007) | 1.0004 (1.0000, 1.0008) | 1.0004 (1.0000, 1.0008) |
|                                  | AVGT      | 1.0002 (0.9998, 1.0006) | 1.0003 (0.9999, 1.0007) | 1.0001 (0.9997, 1.0005) | 1.0000 (0.9996, 1.0005) |
|                                  | MAXAT     | 0.9999 (0.9995, 1.0003) | 0.9998 (0.9994, 1.0002) | 0.9997 (0.9993, 1.0001) | 0.9997 (0.9993, 1.0001) |
|                                  | MINAT     | 1.0004 (1.0000, 1.0009) | 1.0004 (0.9999, 1.0009) | 1.0001 (0.9996, 1.0006) | 1.0001 (0.9997, 1.0006) |
|                                  | AVGAT     | 1.0001 (0.9997, 1.0005) | 1.0002 (0.9997, 1.0006) | 0.9998 (0.9994, 1.0003) | 0.9998 (0.9993, 1.0002) |
| Fluid and electrolyte imbalance  | MAXT      | 1.0016 (0.9997, 1.0035) | 0.9986 (0.9967, 1.0005) | 1.0011 (0.9991, 1.0031) | 1.0006 (0.9986, 1.0026) |
|                                  | MINT      | 1.0017 (0.9999, 1.0035) | 1.0004 (0.9986, 1.0022) | 1.0000 (0.9982, 1.0018) | 0.9993 (0.9975, 1.0012) |
|                                  | AVGT      | 1.0007 (0.9988, 1.0026) | 0.9991 (0.9971, 1.0010) | 0.9988 (0.9967, 1.0008) | 0.9982 (0.9961, 1.0003) |
|                                  | MAXAT     | 1.0002 (0.9984, 1.0021) | 0.9983 (0.9965, 1.0002) | 0.9978 (0.9958, 0.9997) | 0.9985 (0.9965, 1.0004) |
|                                  | MINAT     | 0.9992 (0.9969, 1.0016) | 0.9994 (0.9970, 1.0018) | 0.9999 (0.9975, 1.0023) | 0.9996 (0.9972, 1.0020) |
|                                  | AVGAT     | 1.0004 (0.9984, 1.0024) | 0.9988 (0.9968, 1.0007) | 0.9968 (0.9947, 0.9988) | 0.9973 (0.9953, 0.9994) |
| All renal disease                | MAXT      | 1.0012 (0.9998, 1.0025) | 0.9998 (0.9985, 1.0012) | 1.0008 (0.9994, 1.0021) | 1.0011 (0.9998, 1.0025) |
|                                  | MINT      | 1.0010 (0.9998, 1.0022) | 1.0011 (0.9999, 1.0023) | 1.0012 (1.0000, 1.0024) | 1.0008 (0.9996, 1.0020) |
|                                  | AVGT      | 1.0011 (0.9997, 1.0025) | 1.0011 (0.9998, 1.0025) | 1.0004 (0.9990, 1.0017) | 1.0003 (0.9990, 1.0017) |
|                                  | MAXAT     | 1.0011 (0.9998, 1.0025) | 0.9994 (0.9981, 1.0007) | 1.0000 (0.9987, 1.0014) | 1.0006 (0.9992, 1.0019) |
|                                  | MINAT     | 1.0009 (0.9993, 1.0025) | 1.0011 (0.9995, 1.0027) | 1.0000 (0.9984, 1.0016) | 1.0003 (0.9987, 1.0019) |
|                                  | AVGAT     | 1.0009 (0.9996, 1.0023) | 1.0012 (0.9998, 1.0025) | 1.0011 (0.9997, 1.0025) | 1.0003 (0.9990, 1.0017) |
| Nephritis and nephrotic syndrome | MAXT      | 1.0009 (0.9980, 1.0038) | 0.9993 (0.9964, 1.0022) | 1.0021 (0.9992, 1.0051) | 1.0021 (0.9991, 1.0052) |
|                                  | MINT      | 1.0027 (1.0000, 1.0054) | 1.0015 (0.9988, 1.0042) | 1.0013 (0.9986, 1.0040) | 1.0014 (0.9987, 1.0041) |
|                                  | AVGT      | 1.0007 (0.9977, 1.0036) | 0.9983 (0.9954, 1.0013) | 0.9995 (0.9965, 1.0025) | 1.0009 (0.9978, 1.0039) |
|                                  | MAXAT     | 1.0023 (0.9994, 1.0052) | 0.9995 (0.9966, 1.0024) | 1.0010 (0.9981, 1.0040) | 0.9991 (0.9962, 1.0021) |
|                                  | MINAT     | 1.0013 (0.9978, 1.0048) | 1.0022 (0.9988, 1.0057) | 1.0005 (0.9970, 1.0041) | 0.9990 (0.9954, 1.0026) |
|                                  | AVGAT     | 1.0012 (0.9982, 1.0041) | 1.0018 (0.9988, 1.0047) | 1.0013 (0.9983, 1.0043) | 0.9976 (0.9945, 1.0006) |
| Acute renal failure              | MAXT      | 1.0015 (0.9984, 1.0046) | 0.9993 (0.9963, 1.0023) | 1.0022 (0.9991, 1.0053) | 1.0025 (0.9993, 1.0057) |
|                                  | MINT      | 1.0029 (1.0001, 1.0057) | 1.0015 (0.9987, 1.0044) | 1.0017 (0.9989, 1.0046) | 1.0021 (0.9992, 1.0050) |
|                                  | AVGT      | 1.0020 (0.9989, 1.0051) | 0.9987 (0.9956, 1.0018) | 0.9989 (0.9957, 1.0021) | 1.0010 (0.9978, 1.0043) |
|                                  | MAXAT     | 1.0040 (1.0009, 1.0070) | 1.0002 (0.9972, 1.0033) | 1.0004 (0.9973, 1.0036) | 0.9988 (0.9956, 1.0020) |
|                                  | MINAT     | 1.0015 (0.9979, 1.0052) | 1.0031 (0.9995, 1.0068) | 1.0014 (0.9977, 1.0051) | 0.9996 (0.9958, 1.0034) |
|                                  | AVGAT     | 1.0021 (0.9990, 1.0051) | 1.0029 (0.9998, 1.0060) | 1.0008 (0.9977, 1.0040) | 0.9972 (0.9940, 1.0005) |

Table S5 continued

| Outcome                        | Heat Wave | lag0                    | lag1                    | lag2                    | lag3                    |
|--------------------------------|-----------|-------------------------|-------------------------|-------------------------|-------------------------|
|                                |           | R.R. (95% C.I.)         | R.R. (95% C.I.)         | R.R. (95% C.I.)         | R.R. (95% C.I.)         |
| All circulatory system disease | MAXT      | 1.0004 (0.9999, 1.0008) | 1.0001 (0.9997, 1.0006) | 1.0004 (0.9999, 1.0008) | 0.9999 (0.9995, 1.0003) |
|                                | MINT      | 1.0005 (1.0001, 1.0008) | 1.0006 (1.0002, 1.0010) | 1.0002 (0.9998, 1.0006) | 1.0002 (0.9999, 1.0006) |
|                                | AVGT      | 1.0002 (0.9998, 1.0007) | 0.9999 (0.9995, 1.0004) | 1.0001 (0.9996, 1.0005) | 0.9998 (0.9994, 1.0003) |
|                                | MAXAT     | 0.9999 (0.9995, 1.0003) | 1.0002 (0.9998, 1.0006) | 0.9999 (0.9995, 1.0004) | 0.9997 (0.9993, 1.0001) |
|                                | MINAT     | 1.0003 (0.9998, 1.0008) | 1.0001 (0.9996, 1.0006) | 1.0000 (0.9995, 1.0005) | 1.0002 (0.9997, 1.0007) |
|                                | AVGAT     | 1.0002 (0.9998, 1.0006) | 1.0005 (1.0000, 1.0009) | 0.9999 (0.9994, 1.0003) | 0.9997 (0.9993, 1.0001) |
| Hypertension                   | MAXT      | 1.0006 (1.0001, 1.0011) | 1.0002 (0.9997, 1.0007) | 1.0004 (0.9999, 1.0009) | 0.9999 (0.9994, 1.0004) |
|                                | MINT      | 1.0003 (0.9999, 1.0007) | 1.0007 (1.0003, 1.0011) | 1.0001 (0.9997, 1.0006) | 1.0003 (0.9999, 1.0007) |
|                                | AVGT      | 1.0002 (0.9997, 1.0007) | 0.9999 (0.9995, 1.0004) | 1.0001 (0.9996, 1.0006) | 0.9999 (0.9994, 1.0004) |
|                                | MAXAT     | 0.9999 (0.9995, 1.0004) | 1.0002 (0.9997, 1.0007) | 1.0000 (0.9995, 1.0005) | 0.9996 (0.9991, 1.0001) |
|                                | MINAT     | 1.0002 (0.9997, 1.0008) | 1.0002 (0.9997, 1.0008) | 0.9999 (0.9993, 1.0005) | 1.0003 (0.9998, 1.0009) |
|                                | AVGAT     | 1.0001 (0.9996, 1.0006) | 1.0004 (0.9999, 1.0009) | 0.9997 (0.9992, 1.0002) | 0.9997 (0.9993, 1.0002) |
| Ischemic heart disease         | MAXT      | 1.0003 (0.9994, 1.0011) | 0.9998 (0.9990, 1.0007) | 1.0009 (1.0000, 1.0017) | 0.9990 (0.9981, 0.9998) |
|                                | MINT      | 1.0008 (1.0000, 1.0015) | 1.0009 (1.0001, 1.0016) | 0.9999 (0.9992, 1.0007) | 0.9999 (0.9992, 1.0007) |
|                                | AVGT      | 1.0005 (0.9996, 1.0013) | 0.9997 (0.9988, 1.0005) | 1.0003 (0.9995, 1.0012) | 0.9996 (0.9987, 1.0004) |
|                                | MAXAT     | 0.9999 (0.9991, 1.0007) | 0.9996 (0.9988, 1.0005) | 1.0003 (0.9995, 1.0011) | 0.9990 (0.9981, 0.9998) |
|                                | MINAT     | 0.9998 (0.9988, 1.0008) | 0.9998 (0.9988, 1.0008) | 0.9999 (0.9989, 1.0009) | 1.0002 (0.9992, 1.0012) |
|                                | AVGAT     | 1.0001 (0.9992, 1.0009) | 0.9999 (0.9991, 1.0008) | 0.9999 (0.9991, 1.0008) | 0.9992 (0.9984, 1.0001) |
| Dysrhythmia                    | MAXT      | 0.9999 (0.9990, 1.0008) | 0.9996 (0.9987, 1.0005) | 1.0004 (0.9995, 1.0013) | 0.9999 (0.9989, 1.0008) |
|                                | MINT      | 1.0008 (1.0000, 1.0016) | 1.0003 (0.9995, 1.0011) | 1.0000 (0.9992, 1.0009) | 0.9999 (0.9991, 1.0008) |
|                                | AVGT      | 1.0000 (0.9991, 1.0010) | 0.9993 (0.9984, 1.0002) | 1.0003 (0.9993, 1.0012) | 0.9998 (0.9988, 1.0007) |
|                                | MAXAT     | 0.9992 (0.9983, 1.0001) | 0.9997 (0.9988, 1.0006) | 0.9998 (0.9989, 1.0008) | 1.0008 (0.9999, 1.0017) |
|                                | MINAT     | 1.0002 (0.9991, 1.0013) | 0.9994 (0.9983, 1.0005) | 0.9994 (0.9983, 1.0005) | 0.9991 (0.9980, 1.0002) |
|                                | AVGAT     | 0.9996 (0.9987, 1.0006) | 1.0005 (0.9996, 1.0015) | 1.0004 (0.9995, 1.0013) | 1.0001 (0.9992, 1.0010) |
| Congestive heart failure       | MAXT      | 0.9996 (0.9985, 1.0007) | 0.9994 (0.9983, 1.0004) | 1.0000 (0.9989, 1.0011) | 0.9980 (0.9970, 0.9991) |
|                                | MINT      | 1.0004 (0.9994, 1.0013) | 1.0009 (1.0000, 1.0019) | 0.9999 (0.9990, 1.0008) | 1.0002 (0.9993, 1.0012) |
|                                | AVGT      | 0.9989 (0.9978, 1.0000) | 0.9999 (0.9988, 1.0010) | 1.0004 (0.9994, 1.0015) | 0.9993 (0.9983, 1.0004) |
|                                | MAXAT     | 0.9994 (0.9984, 1.0005) | 1.0001 (0.9991, 1.0012) | 0.9995 (0.9985, 1.0005) | 0.9985 (0.9974, 0.9995) |
|                                | MINAT     | 1.0003 (0.9991, 1.0016) | 0.9995 (0.9982, 1.0007) | 0.9998 (0.9986, 1.0011) | 1.0008 (0.9996, 1.0021) |
|                                | AVGAT     | 1.0002 (0.9991, 1.0012) | 1.0001 (0.9991, 1.0012) | 0.9997 (0.9986, 1.0008) | 0.9996 (0.9985, 1.0007) |
| Ischemic stroke                | MAXT      | 1.0025 (1.0007, 1.0044) | 1.0013 (0.9994, 1.0031) | 1.0008 (0.9989, 1.0027) | 1.0009 (0.9990, 1.0028) |
|                                | MINT      | 1.0011 (0.9994, 1.0027) | 1.0002 (0.9985, 1.0019) | 1.0008 (0.9991, 1.0025) | 0.9997 (0.9980, 1.0014) |
|                                | AVGT      | 1.0011 (0.9992, 1.0030) | 1.0006 (0.9987, 1.0024) | 1.0008 (0.9989, 1.0027) | 0.9999 (0.9980, 1.0018) |
|                                | MAXAT     | 1.0017 (0.9999, 1.0035) | 0.9999 (0.9981, 1.0017) | 0.9983 (0.9965, 1.0001) | 1.0001 (0.9983, 1.0019) |
|                                | MINAT     | 1.0008 (0.9987, 1.0030) | 1.0019 (0.9997, 1.0041) | 1.0003 (0.9981, 1.0025) | 0.9991 (0.9969, 1.0013) |
|                                | AVGAT     | 1.0008 (0.9989, 1.0026) | 1.0007 (0.9989, 1.0026) | 0.9997 (0.9979, 1.0016) | 0.9997 (0.9978, 1.0015) |

Table S5 continued

| Outcome                               | Heat Wave | lag0                    | lag1                    | lag2                    | lag3                    |
|---------------------------------------|-----------|-------------------------|-------------------------|-------------------------|-------------------------|
|                                       |           | R.R. (95% C.I.)         | R.R. (95% C.I.)         | R.R. (95% C.I.)         | R.R. (95% C.I.)         |
| All respiratory system disease        | MAXT      | 1.0006 (0.9995, 1.0017) | 1.0012 (1.0001, 1.0023) | 1.0005 (0.9994, 1.0016) | 1.0005 (0.9994, 1.0016) |
|                                       | MINT      | 1.0001 (0.9991, 1.0011) | 1.0001 (0.9991, 1.0011) | 0.9995 (0.9985, 1.0005) | 0.9996 (0.9986, 1.0006) |
|                                       | AVGT      | 1.0000 (0.9989, 1.0011) | 1.0002 (0.9991, 1.0014) | 0.9996 (0.9985, 1.0007) | 0.9997 (0.9986, 1.0008) |
|                                       | MAXAT     | 0.9990 (0.9979, 1.0001) | 0.9991 (0.9980, 1.0002) | 0.9990 (0.9979, 1.0001) | 0.9987 (0.9976, 0.9997) |
|                                       | MINAT     | 1.0003 (0.9990, 1.0016) | 1.0002 (0.9988, 1.0015) | 0.9994 (0.9981, 1.0007) | 0.9998 (0.9985, 1.0011) |
|                                       | AVGAT     | 0.9994 (0.9983, 1.0006) | 0.9994 (0.9983, 1.0006) | 0.9992 (0.9980, 1.0003) | 0.9992 (0.9980, 1.0003) |
| Pneumonia                             | MAXT      | 1.0002 (0.9983, 1.0021) | 0.9992 (0.9973, 1.0011) | 1.0003 (0.9984, 1.0022) | 1.0013 (0.9994, 1.0033) |
|                                       | MINT      | 0.9998 (0.9981, 1.0015) | 0.9994 (0.9977, 1.0011) | 0.9996 (0.9978, 1.0013) | 0.9989 (0.9972, 1.0007) |
|                                       | AVGT      | 0.9987 (0.9968, 1.0007) | 0.9993 (0.9973, 1.0013) | 0.9980 (0.9961, 1.0000) | 0.9996 (0.9976, 1.0015) |
|                                       | MAXAT     | 0.9985 (0.9966, 1.0005) | 0.9985 (0.9966, 1.0004) | 0.9979 (0.9961, 0.9998) | 0.9992 (0.9973, 1.0010) |
|                                       | MINAT     | 0.9988 (0.9965, 1.0011) | 1.0010 (0.9987, 1.0033) | 1.0002 (0.9979, 1.0025) | 0.9993 (0.9970, 1.0016) |
|                                       | AVGAT     | 0.9989 (0.9969, 1.0009) | 0.9997 (0.9977, 1.0017) | 0.9995 (0.9975, 1.0015) | 0.9994 (0.9974, 1.0013) |
| Chronic obstructive pulmonary disease | MAXT      | 1.0007 (0.9996, 1.0018) | 1.0002 (0.9992, 1.0013) | 1.0007 (0.9996, 1.0017) | 0.9994 (0.9983, 1.0005) |
|                                       | MINT      | 1.0009 (0.9999, 1.0019) | 1.0006 (0.9996, 1.0016) | 0.9999 (0.9989, 1.0008) | 1.0000 (0.9990, 1.0009) |
|                                       | AVGT      | 1.0006 (0.9995, 1.0017) | 0.9995 (0.9984, 1.0006) | 0.9996 (0.9985, 1.0007) | 0.9992 (0.9981, 1.0002) |
|                                       | MAXAT     | 0.9997 (0.9987, 1.0008) | 0.9996 (0.9985, 1.0006) | 1.0003 (0.9992, 1.0014) | 0.9985 (0.9975, 0.9996) |
|                                       | MINAT     | 1.0006 (0.9993, 1.0018) | 1.0003 (0.9991, 1.0016) | 0.9992 (0.9979, 1.0005) | 1.0008 (0.9995, 1.0021) |
|                                       | AVGAT     | 0.9994 (0.9983, 1.0005) | 1.0000 (0.9989, 1.0011) | 0.9999 (0.9988, 1.0010) | 0.9997 (0.9986, 1.0008) |
| Asthma/wheeze                         | MAXT      | 1.0005 (0.9988, 1.0023) | 1.0011 (0.9993, 1.0029) | 1.0018 (1.0000, 1.0036) | 1.0003 (0.9986, 1.0021) |
|                                       | MINT      | 0.9988 (0.9972, 1.0004) | 0.9992 (0.9976, 1.0008) | 0.9996 (0.9980, 1.0012) | 1.0001 (0.9985, 1.0017) |
|                                       | AVGT      | 0.9973 (0.9955, 0.9992) | 0.9990 (0.9971, 1.0008) | 1.0000 (0.9981, 1.0018) | 1.0000 (0.9981, 1.0018) |
|                                       | MAXAT     | 0.9978 (0.9960, 0.9996) | 0.9980 (0.9962, 0.9998) | 0.9984 (0.9966, 1.0002) | 0.9979 (0.9961, 0.9996) |
|                                       | MINAT     | 0.9999 (0.9978, 1.0021) | 0.9987 (0.9966, 1.0008) | 0.9987 (0.9965, 1.0008) | 0.9997 (0.9976, 1.0019) |
|                                       | AVGAT     | 0.9991 (0.9972, 1.0009) | 0.9990 (0.9971, 1.0008) | 0.9987 (0.9969, 1.0006) | 0.9992 (0.9974, 1.0010) |
| Diabetes mellitus                     | MAXT      | 0.9989 (0.9971, 1.0008) | 1.0006 (0.9988, 1.0024) | 1.0022 (1.0004, 1.0040) | 1.0001 (0.9982, 1.0019) |
|                                       | MINT      | 0.9989 (0.9973, 1.0005) | 0.9998 (0.9982, 1.0014) | 1.0008 (0.9992, 1.0025) | 0.9993 (0.9977, 1.0010) |
|                                       | AVGT      | 0.9995 (0.9977, 1.0014) | 0.9997 (0.9979, 1.0016) | 1.0008 (0.9990, 1.0027) | 0.9973 (0.9955, 0.9992) |
|                                       | MAXAT     | 0.9997 (0.9979, 1.0015) | 1.0009 (0.9991, 1.0027) | 1.0002 (0.9984, 1.0020) | 0.9985 (0.9967, 1.0003) |
|                                       | MINAT     | 1.0016 (0.9994, 1.0037) | 1.0000 (0.9978, 1.0021) | 1.0007 (0.9986, 1.0029) | 0.9985 (0.9964, 1.0007) |
|                                       | AVGAT     | 1.0004 (0.9986, 1.0022) | 0.9989 (0.9970, 1.0007) | 1.0017 (0.9998, 1.0035) | 0.9984 (0.9965, 1.0002) |
| Intestinal infection                  | MAXT      | 0.9992 (0.9962, 1.0023) | 1.0014 (0.9983, 1.0044) | 1.0029 (0.9999, 1.0060) | 1.0008 (0.9978, 1.0039) |
|                                       | MINT      | 1.0032 (1.0004, 1.0060) | 1.0013 (0.9985, 1.0041) | 1.0002 (0.9974, 1.0031) | 0.9987 (0.9959, 1.0016) |
|                                       | AVGT      | 1.0006 (0.9975, 1.0038) | 1.0033 (1.0002, 1.0064) | 1.0013 (0.9982, 1.0044) | 1.0013 (0.9982, 1.0045) |
|                                       | MAXAT     | 0.9998 (0.9967, 1.0028) | 1.0001 (0.9971, 1.0031) | 1.0024 (0.9994, 1.0054) | 1.0017 (0.9987, 1.0047) |
|                                       | MINAT     | 0.9988 (0.9951, 1.0025) | 1.0019 (0.9983, 1.0056) | 1.0001 (0.9965, 1.0037) | 0.9996 (0.9960, 1.0033) |
|                                       | AVGAT     | 1.0009 (0.9977, 1.0040) | 1.0017 (0.9986, 1.0048) | 1.0012 (0.9981, 1.0044) | 1.0003 (0.9972, 1.0035) |

**Figure S1.** Estimated relative risks and 95% confidence intervals for ED visits associated with lag 0 heat wave days compared to non-heat wave days, controlling for different continuous temperature metrics. Heat waves were defined as periods of  $\geq 2$  consecutive days with daily maximum (MAX) or minimum (MIN) ambient temperature (T) or apparent temperature (AT) exceeding the 98<sup>th</sup> percentile. The first day of each heat wave period was considered a non-heat wave day. Estimates for heat wave and continuous temperature defined using the same metric (i.e. primary health model) are shown in blue.

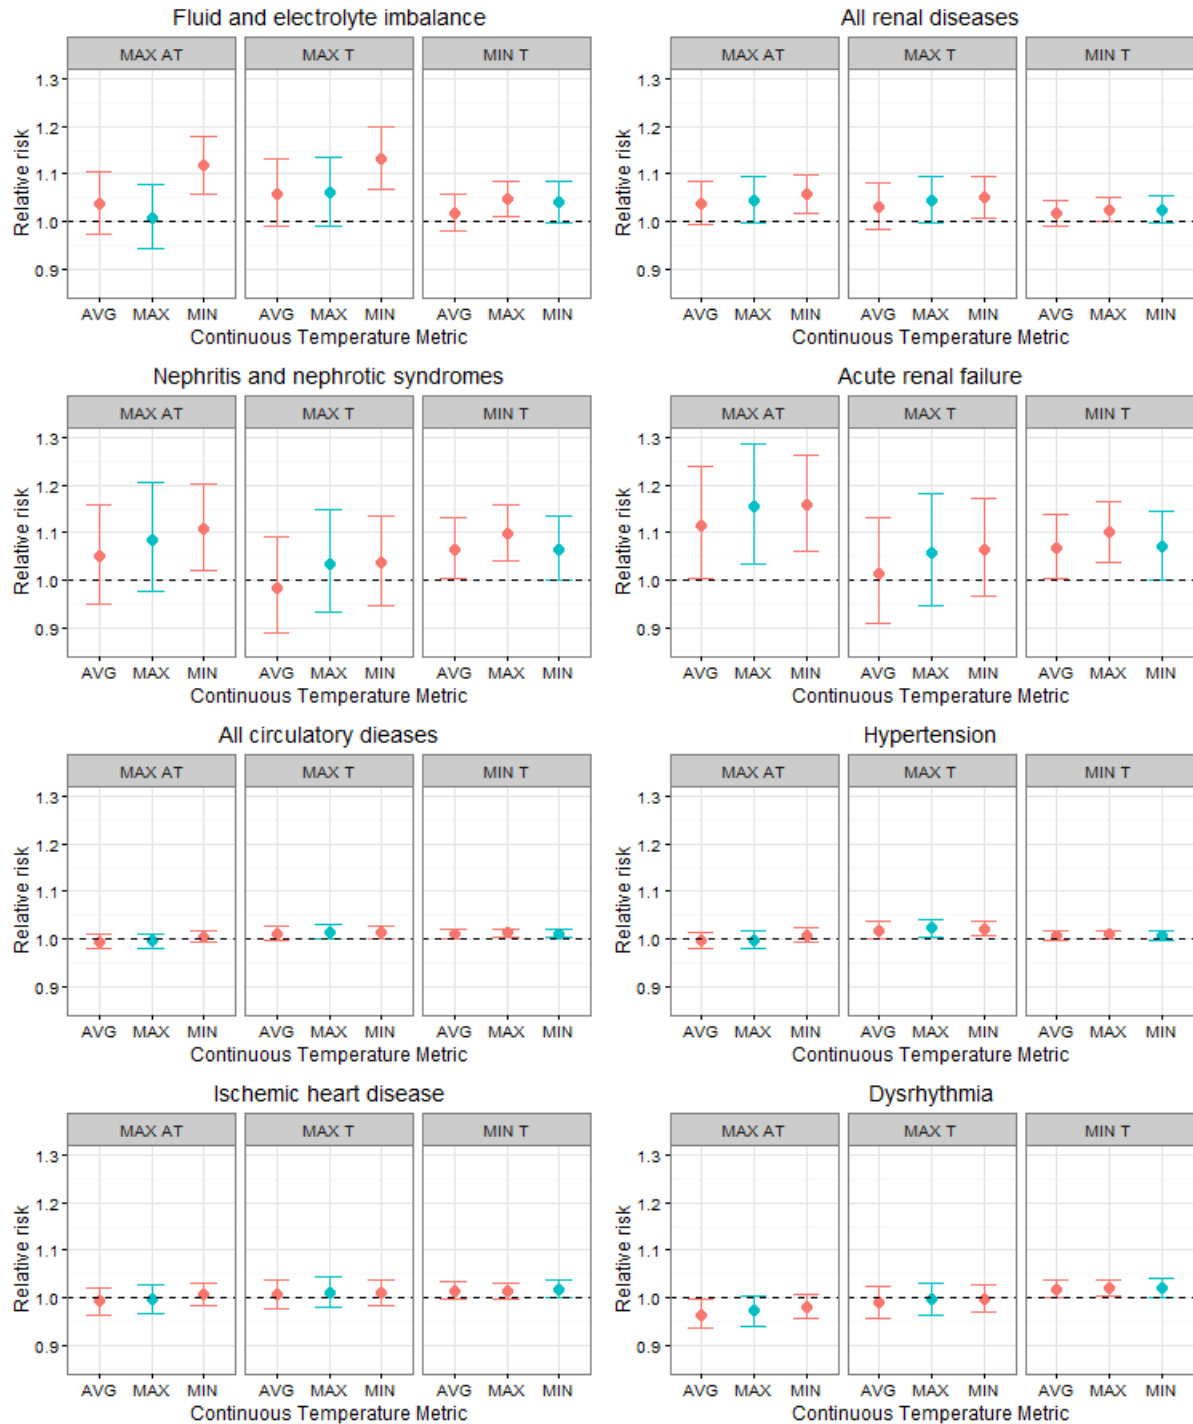

Figure S1 (Continued)

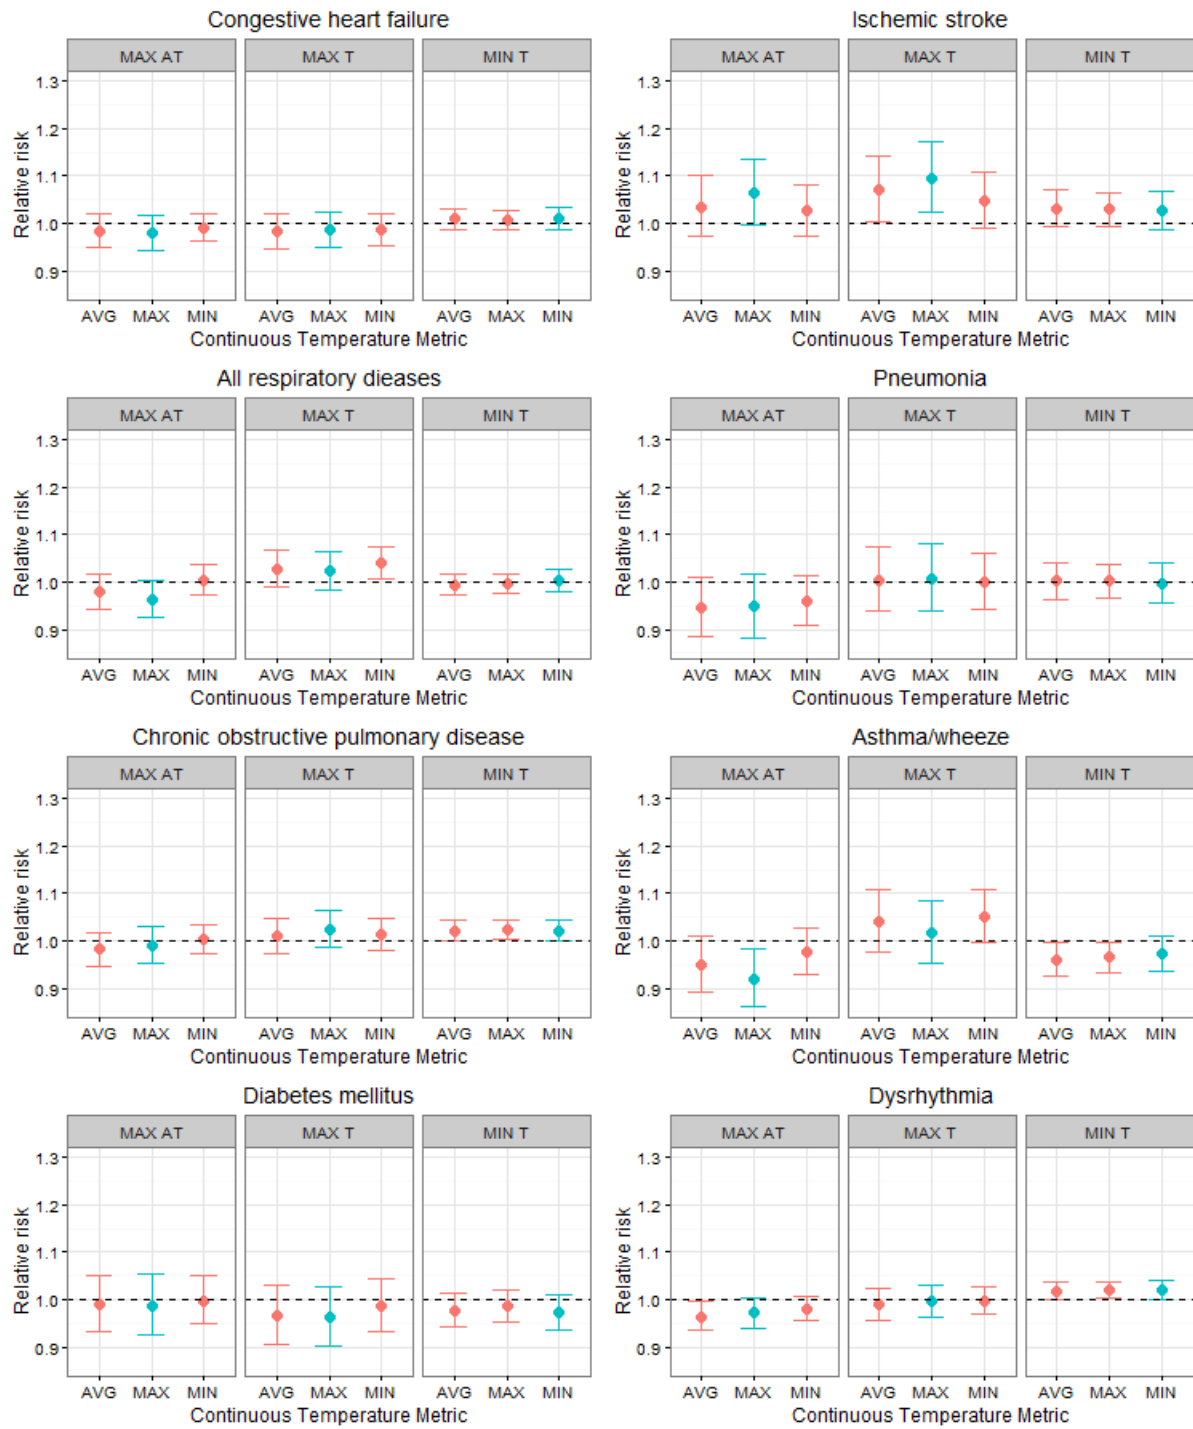

**Figure S2.** Estimated relative risks and 95% confidence intervals for ED visits associated with lag 0 and lag 1 heat wave days compared to non-heat wave days, controlling for different continuous dew-point temperature (DT) and relative humidity metrics (RH). Heat waves were defined as periods of  $\geq 2$  consecutive days with daily maximum (MAX) or minimum (MIN) ambient temperature (T) exceeding the 98<sup>th</sup> percentile. The first day of each heat wave period was considered a non-heat wave day. Estimates for heat wave and maximum dew-point temperature (i.e. primary health model) are shown in blue.

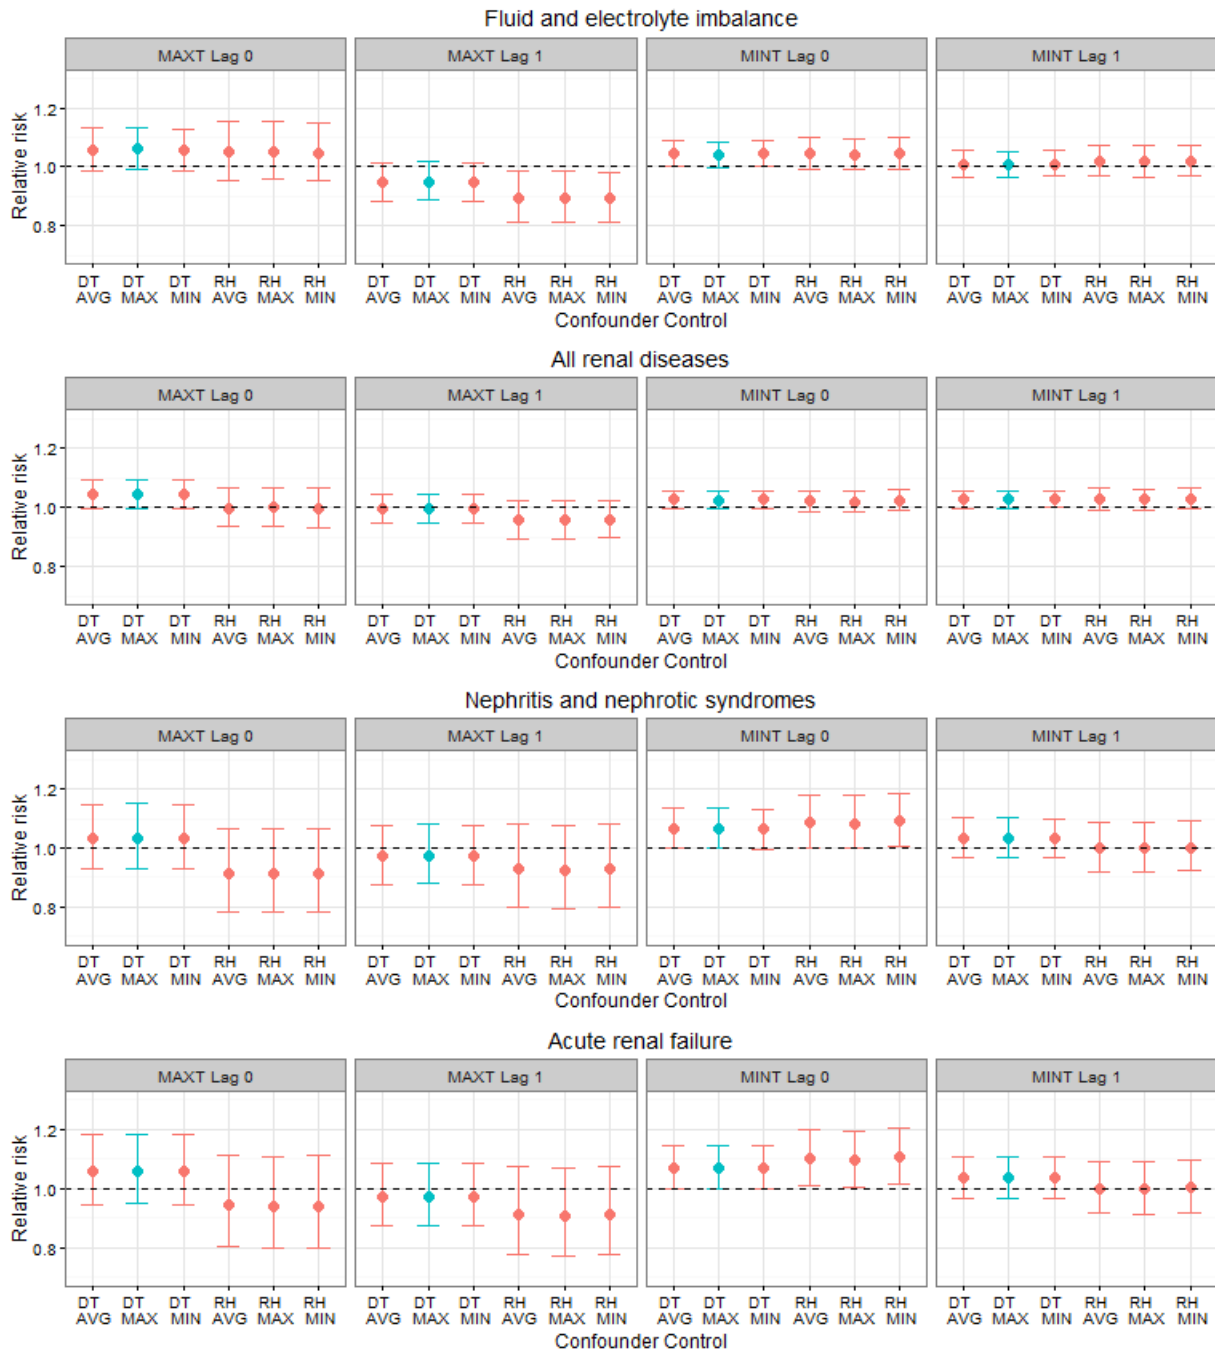



Figure S2 (Continued)

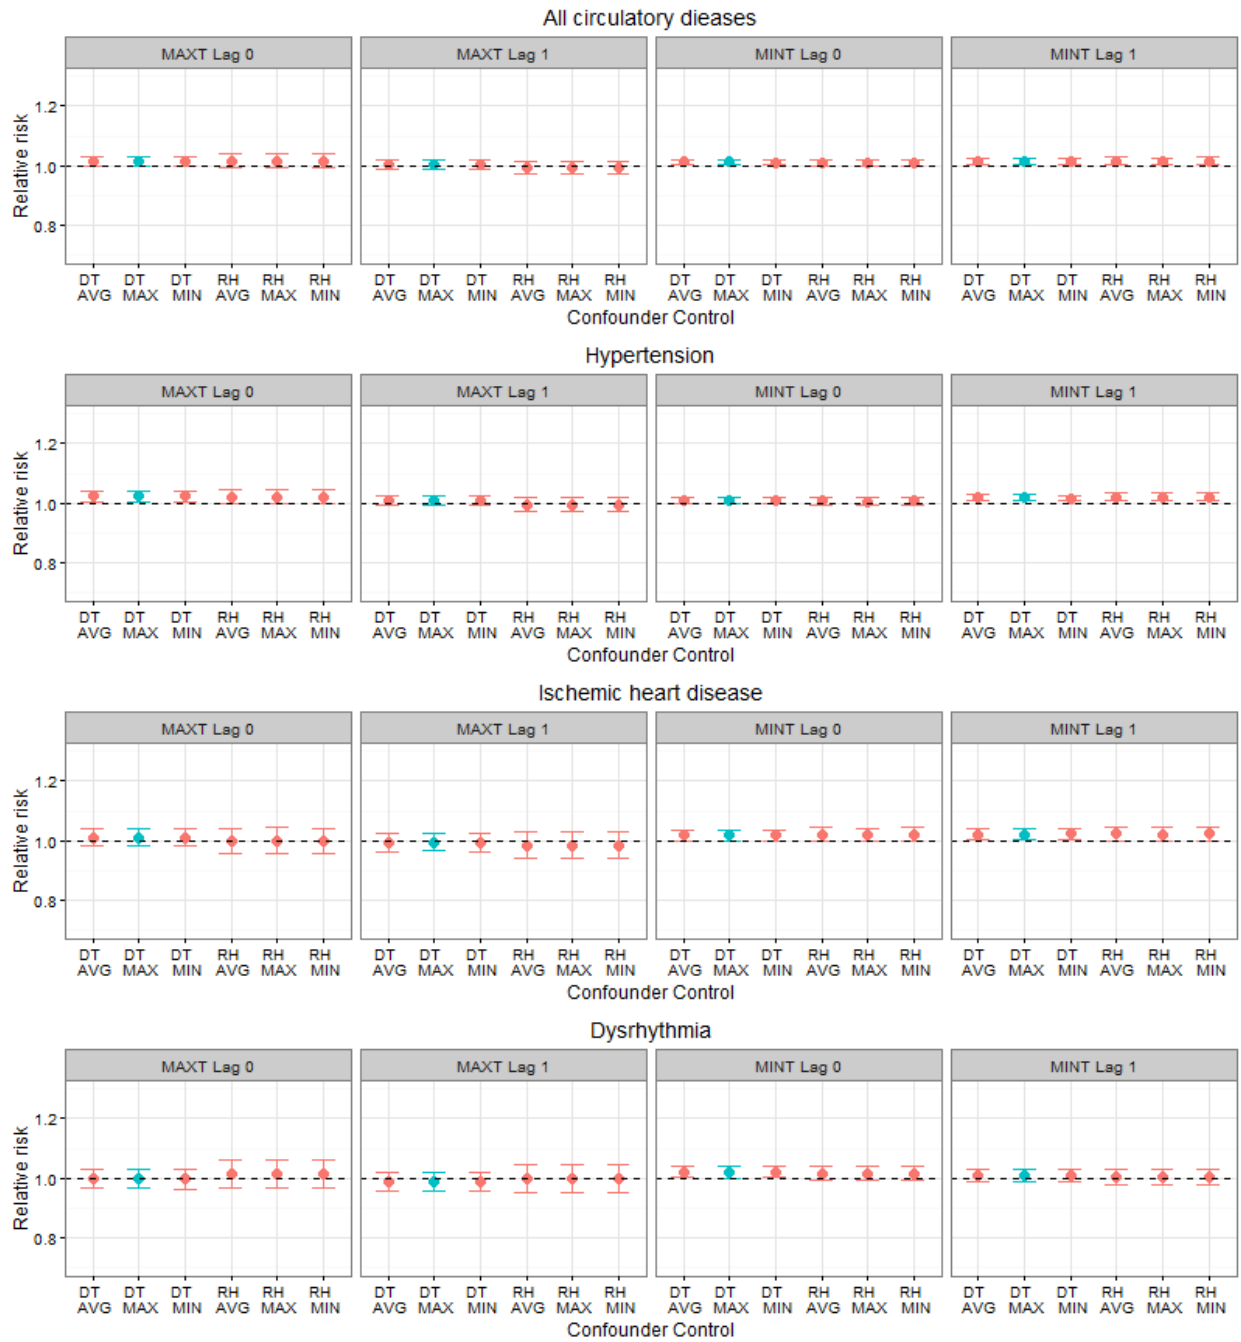



Figures S2 (Continued)

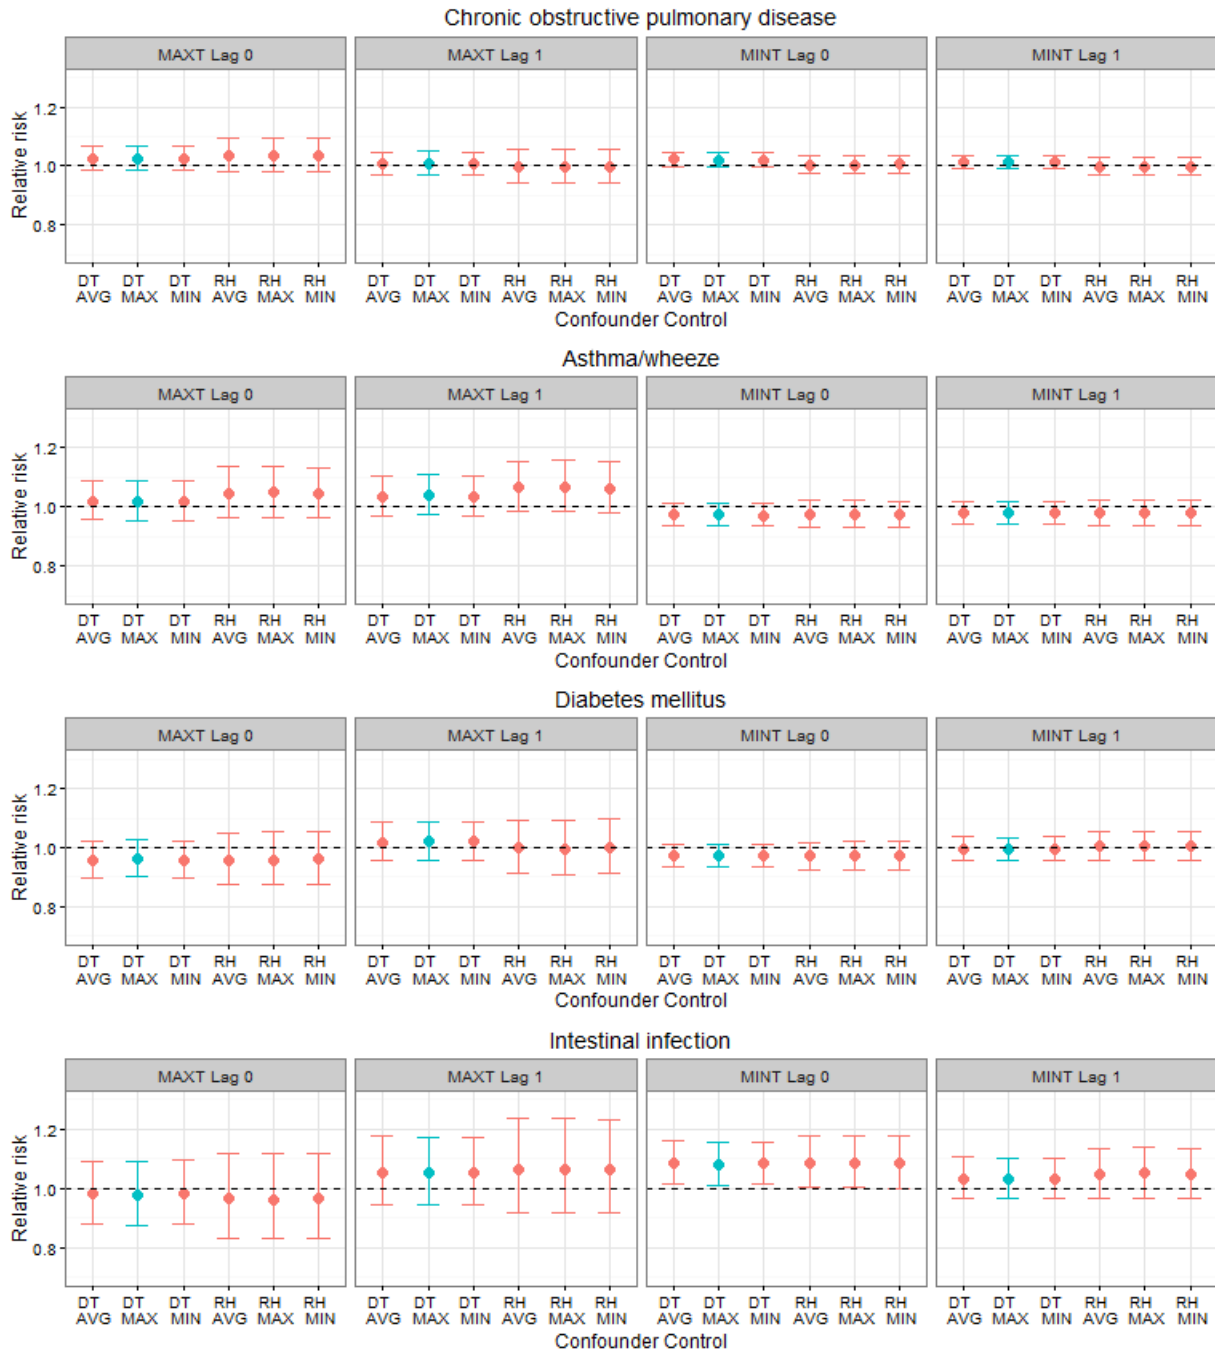

Supplement: EHP44.s001.acco.pdf [file EHP44.s001.acco.pdf]
